# Supplementary material
Source: publisher site journal article supplement (http://www.kjim.org/upload/media/kjim-2021-069-suppl1.pdf)
Supplement: Supplementary file 1 [file kjim-2021-069-suppl1.pdf]

**Supplementary Table 1. Included variables for the least absolute shrinkage and selection operator analysis**

| Demographic                                                                 | Symptoms                     | Comorbidities           | Laboratory findings                          | CT findings                       |
|-----------------------------------------------------------------------------|------------------------------|-------------------------|----------------------------------------------|-----------------------------------|
| Age                                                                         | Acute onset ( $\leq 3$ days) | Hypertension            | Leukocytosis ( $> 10,000/\mu\text{L}$ )      | Ground glass opacity              |
| Body mass index, $\text{kg}/\text{m}^2$                                     | Dyspnea                      | History of tuberculosis | Thrombocytopenia ( $< 150,000/\mu\text{L}$ ) | Consolidation                     |
| New-onset or a recent increase in the quantity of smoking ( $\leq 4$ weeks) | Fever                        | Chronic lung disease    | Eosinophilia ( $> 500/\mu\text{L}$ )         | Interlobular septal thickening    |
| Smoking amount, packs/day                                                   | Chills                       | Any type of allergy     | Neutrophil-to-lymphocyte ratio               | Bronchovascular bundle thickening |
|                                                                             | Night sweats                 | Chronic liver disease   | C-reactive protein (mg/dL)                   | Centrilobular nodules             |
|                                                                             | Cough                        | History of AEP          |                                              | Pleural effusion                  |
|                                                                             | Sputum                       | Allergy                 |                                              | Bilateral involvement             |
|                                                                             | Rhinorrhoea                  |                         |                                              |                                   |
|                                                                             | Chest pain                   |                         |                                              |                                   |
|                                                                             | Myalgia                      |                         |                                              |                                   |
|                                                                             | Fatigue                      |                         |                                              |                                   |
|                                                                             | Palpitation                  |                         |                                              |                                   |
|                                                                             | Sore throat                  |                         |                                              |                                   |

CT, computed tomography; AEP, acute eosinophilic pneumonia.
